# Supplementary material for: Facile, high-yielding preparation of pyrrolidinium, piperidinium, morpholinium and 2,3-dihydro-1H-isoindolinium salts and ionic liquids from secondary amines
Source: Royal Society of Chemistry journal article supplement (doi:10.1039/c4ra03226h), 2014-01-01
Supplement: c4ra03226h1.pdf [file c4ra03226h1.pdf]

**FACILE, HIGH-YIELDING PREPARATION OF PYRROLIDINIUM, PIPERIDINIUM,  
MORPHOLINIUM AND 2,3-DIHYDRO-1*H*-ISOINDOLINIUM SALTS AND IONIC  
LIQUIDS FROM SECONDARY AMINES**

**Supplementary Information**

Antony J. Ward, Anthony F. Masters, Thomas Maschmeyer\*

Laboratory of Advanced Catalysis for Sustainability, School of Chemistry F11, The University of  
Sydney, NSW, 2006, AUSTRALIA

## CALCULATION OF OVERALL “GREENNESS” SCORE

### EHS Scores for the chemicals used

| CHEMICAL                                                                  | HEALTH | SAFETY | ENVIRON. | EHS SCORE <sup>a</sup> |
|---------------------------------------------------------------------------|--------|--------|----------|------------------------|
| K <sub>2</sub> CO <sub>3</sub>                                            | 7      | 10     | 10       | 8.9                    |
| LiNTf <sub>2</sub>                                                        | 4      | 10     | 7        | 6.5                    |
| Br(CH <sub>2</sub> ) <sub>4</sub> Br                                      | 4      | 10     | 10       | 7.4                    |
| Br(CH <sub>2</sub> ) <sub>5</sub> Br                                      | 10     | 10     | 10       | 10                     |
| {Br(CH <sub>2</sub> ) <sub>2</sub> } <sub>2</sub> O                       | 7      | 10     | 10       | 8.9                    |
| <i>o</i> -C <sub>6</sub> H <sub>4</sub> (CH <sub>2</sub> Br) <sub>2</sub> | 4      | 10     | 10       | 7.4                    |
| HN(C <sub>2</sub> H <sub>5</sub> ) <sub>2</sub>                           | 7      | 4      | 10       | 6.5                    |
| HN(C <sub>3</sub> H <sub>7</sub> ) <sub>2</sub>                           | 7      | 4      | 10       | 6.5                    |
| HN(C <sub>4</sub> H <sub>9</sub> ) <sub>2</sub>                           | 7      | 4      | 10       | 6.5                    |
| HN(C <sub>2</sub> H <sub>5</sub> )(C <sub>4</sub> H <sub>9</sub> )        | 7      | 4      | 10       | 6.5                    |
| HN(CH <sub>3</sub> )(C <sub>4</sub> H <sub>9</sub> )                      | 7      | 4      | 10       | 6.5                    |
| Pyrrolidine                                                               | 7      | 4      | 10       | 6.5                    |
| Piperidine                                                                | 4      | 4      | 10       | 5.4                    |
| Morpholine                                                                | 7      | 7      | 10       | 7.9                    |
| Formaldehyde                                                              | 1      | 10     | 1        | 2.2                    |
| C <sub>4</sub> H <sub>9</sub> Br                                          | 10     | 4      | 4        | 5.4                    |
| CH <sub>3</sub> CO <sub>2</sub> H                                         | 4      | 7      | 10       | 6.5                    |
| Zinc                                                                      | 10     | 1      | 1        | 2.2                    |
| NaBH <sub>4</sub>                                                         | 4      | 4      | 10       | 5.4                    |

<sup>a</sup> Determined by the geometric mean of the Health, Safety, and Environmental scores.

## Assessment of Chemistry scores

|                       | For the new method: | For Scheme 4: |
|-----------------------|---------------------|---------------|
| Work-up               | 10                  | 7             |
| Co-reagents           | 4                   | 4             |
| Other issues          | 10                  | 10            |
| Stoichiometry         | 7                   | 1             |
| Clean Chemistry score | 7.3                 | 4.1           |

## Calculation of Overall “Greenness” scores

For the synthesis of **15** (*N*-butyl-*N*-methylpyrrolidinium bis(trifluoromethanesulfonyl)imide):

For the new method:

$$\begin{aligned}\text{Overall EHS} &= (\text{EHS}(\text{K}_2\text{CO}_3) \times \text{EHS}(\text{HN}(\text{CH}_3)(\text{C}_4\text{H}_9)) \times \text{EHS}(\text{Br}(\text{CH}_2)_4\text{Br}) \times \text{EHS}(\text{LiNTf}_2))^{1/4} \\ &= (8.9 \times 6.5 \times 7.4 \times 6.5)^{1/4} \\ &= 7.3\end{aligned}$$

$$\begin{aligned}\text{Overall “greenness” score} &= (\text{EHS} \times \text{Clean Chemistry})^{1/2} \\ &= (7.3 \times 7.3)^{1/2} \\ &= 7.3\end{aligned}$$

For Scheme 4 (method 1 in step 1):

$$\begin{aligned}\text{Overall EHS} &= (\text{EHS}(\text{pyrrolidine}) \times \text{EHS}(\text{Zn}) \times \text{EHS}(\text{formaldehyde}) \times \text{EHS}(\text{CH}_3\text{CO}_2\text{H}) \times \\ &\quad \text{EHS}(\text{C}_4\text{H}_9\text{Br}) \times \text{EHS}(\text{LiNTf}_2))^{1/6} \\ &= (6.5 \times 2.2 \times 2.2 \times 6.5 \times 5.4 \times 6.5)^{1/6} \\ &= 4.4\end{aligned}$$

$$\begin{aligned}\text{Overall “greenness” score} &= (\text{EHS} \times \text{Clean Chemistry})^{1/2} \\ &= (4.1 \times 4.4)^{1/2} \\ &= 4.2\end{aligned}$$

For Scheme 4 (method 2 in step 1):

$$\begin{aligned}\text{Overall EHS} &= (\text{EHS}(\text{pyrrolidine}) \times \text{EHS}(\text{formaldehyde}) \times \text{EHS}(\text{NaBH}_4) \times \text{EHS}(\text{C}_4\text{H}_9\text{Br}) \times \\ &\quad \text{EHS}(\text{LiNTf}_2))^{1/5} \\ &= (6.5 \times 2.2 \times 5.4 \times 5.4 \times 6.5)^{1/5} \\ &= 4.9\end{aligned}$$

$$\begin{aligned}\text{Overall "greenness" score} &= (\text{EHS} \times \text{Clean Chemistry})^{1/2} \\ &= (4.9 \times 4.1)^{1/2} \\ &= 4.5\end{aligned}$$
